# Supplementary material
Source: publisher figshare collection journal article supplement (https://plos.figshare.com/articles/dataset/_/7579673)
Supplement: Supplementary file [file 1]

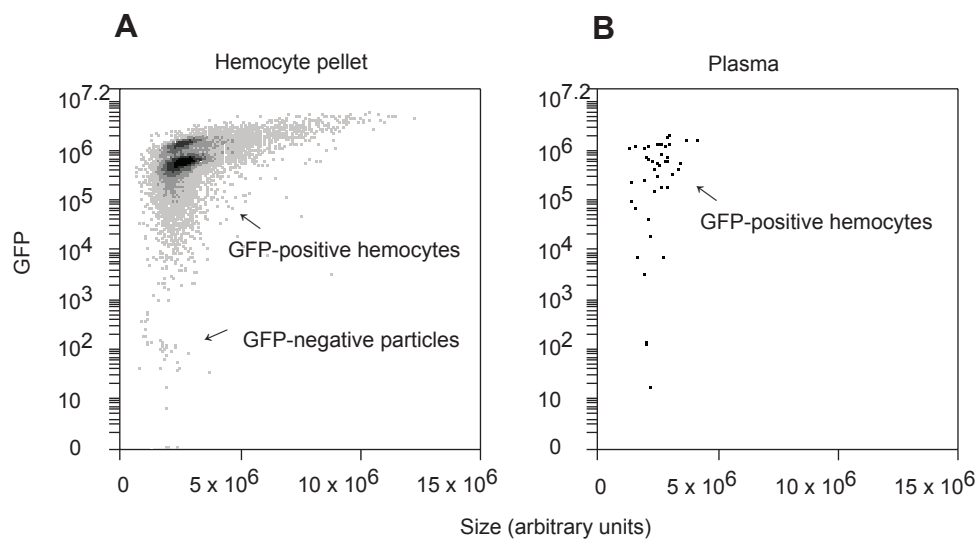

**C**

| Fraction  | Sample 1 | Sample 2 | Sample 3 |
|-----------|----------|----------|----------|
| Hemocytes | 34074    | 44010    | 63729    |
| Plasma    | 279      | 246      | 108      |
